# Supplementary material
Source: PubMed Central journal article supplement (PMC3096734)
Supplement: NIHMS279023-supplement-1.pdf [file NIHMS279023-supplement-1.pdf]

| IHC | Age | Sex | Diagnosis                                       |           | Caspase-8 Weight Index | DR5 Weight Index Cytoplasmic Staining |
|-----|-----|-----|-------------------------------------------------|-----------|------------------------|---------------------------------------|
| 1   | 33  | F   | Pleomorphic rhabdomyosarcoma of right thigh     | Malignant | 135                    | 238                                   |
| 2   | 21  | M   | Embryonic rhabdomyosarcoma of retroperitoneum   | Malignant | 0                      | 0                                     |
| 3   | 51  | F   | Embryonic rhabdomyosarcoma of cervix            | Malignant | 120                    | 233                                   |
| 4   | 16  | M   | Embryonic rhabdomyosarcoma of left testis       | Malignant | 0                      | 0                                     |
| 5   | 49  | F   | Embryonic rhabdomyosarcoma of uterus            | Malignant | 135                    | 285                                   |
| 6   | 30  | M   | Embryonic rhabdomyosarcoma of left leg          | Malignant | 25                     | 15                                    |
| 7   | 18  | M   | Embryonic rhabdomyosarcoma of tongue            | Malignant | 0                      | 85                                    |
| 8   | 91  | M   | Pleomorphic rhabdomyosarcoma of right thigh     | Malignant | 215                    | 278                                   |
| 9   | 74  | F   | Spindle cell rhabdomyosarcoma of bladder (ERMS) | Malignant | 100                    | 250                                   |
| 10  | 67  | F   | Embryonic rhabdomyosarcoma of uterus            | Malignant | 150                    | 285                                   |
| 11  | 40  | F   | Embryonic rhabdomyosarcoma of abdominal cavity  | Malignant | 5                      | 88                                    |
| 12  | 23  | F   | Embryonic rhabdomyosarcoma of abdominal cavity  | Malignant | 25                     | 138                                   |
| 13  | 50  | M   | Pleomorphic rhabdomyosarcoma of right thigh     | Malignant | 190                    | 255                                   |
| 14  | 10  | M   | Embryonic rhabdomyosarcoma of left leg          | Malignant | 15                     | 123                                   |
| 15  | 32  | F   | Embryonic rhabdomyosarcoma of uterus            | Malignant | 135                    | 293                                   |
| 16  | 48  | M   | Alveolar rhabdomyosarcoma of right leg          | Malignant | 195                    | 285                                   |
| 17  | 40  | M   | Alveolar rhabdomyosarcoma of back               | Malignant | 85                     | 245                                   |
| 18  | 49  | M   | Embryonic rhabdomyosarcoma of left testis       | Malignant | 60                     | 170                                   |

| Blots | Age | Sex | Diagnosis                          |           | Caspase-8 | DR5 |
|-------|-----|-----|------------------------------------|-----------|-----------|-----|
| P1    | 20  | M   | Embryonic rhabdomyosarcoma         | Malignant | Pos       | Pos |
| P2    | NA  | NA  | Rhabdomyosarcoma (subtype unknown) | NA        | Pos       | Pos |
| P3    | 2   | F   | Embryonic rhabdomyosarcoma         | Malignant | Pos       | Pos |
| P4    | NA  | NA  | Alveolar rhabdomyosarcoma          | Malignant | Pos       | Pos |
| P5    | 17  | F   | Alveolar rhabdomyosarcoma          | Malignant | Pos       | Pos |
| P6    | 13  | M   | Alveolar rhabdomyosarcoma          | Malignant | Neg       | Neg |

|    |    |    |                                    |           |     |     |
|----|----|----|------------------------------------|-----------|-----|-----|
| P7 | NA | NA | Rhabdomyosarcoma (subtype unknown) | NA        | Pos | Pos |
| P8 | 20 | F  | Alveolar rhabdomyosarcoma          | Malignant | Pos | Pos |

**Supplemental Table 1**
